# Supplementary material for: Nonconventional photoluminescence from sulfonated acetone–formaldehyde condensate with aggregation-enhanced emission
Source: Royal Society of Chemistry journal article supplement (doi:10.1039/c6ra00718j), 2016-01-01
Supplement: c6ra00718j1.pdf [file c6ra00718j1.pdf]

**Electronic Supplementary Information**

**Nonconventional photoluminescence from sulfonated acetone-formaldehyde  
condensate with aggregation-enhanced emission†**

Wei Yu,<sup>ab</sup> Zhongyu Wang,<sup>ab</sup> Dongjie Yang,<sup>ab</sup> Xinping Ouyang,<sup>ab</sup> Xueqing Qiu,<sup>\*ab</sup> and Yuan Li,<sup>\*ab</sup>

<sup>a</sup>School of Chemistry and Chemical Engineering, South China University of  
Technology, Guangzhou, China

<sup>b</sup>State Key Laboratory of Pulp and Paper Engineering, South China University of  
Technology, Guangzhou, China

Corresponding Authors.

\* Yuan Li, Email: [celiy@scut.edu.cn](mailto:celiy@scut.edu.cn), Tel/Fax: +86-20-87114033.

\* Xueqing Qiu, Email: [cexqqiu@scut.edu.cn](mailto:cexqqiu@scut.edu.cn), Tel/Fax: +86-20-87114722.

## Contents

|                                                                                                           |     |
|-----------------------------------------------------------------------------------------------------------|-----|
| <b>1. Materials</b> .....                                                                                 | S3  |
| <b>2. Experiment sections</b> .....                                                                       | S3  |
| <b>2.1</b> Synthesis of sulfonated phenol-acetone-formaldehyde (SPAF) .....                               | S3  |
| <b>2.2</b> Synthesis of sulfonated acetone-formaldehyde (SAF) .....                                       | S4  |
| <b>2.3</b> Characterization and measurements .....                                                        | S4  |
| <b>3. Synthesis routes and chemical structures</b> .....                                                  | S6  |
| <b>4. Partial characterization results</b> .....                                                          | S6  |
| <b>Figure S1</b> Molecular weight distributions of SAF, NSPAF and t-SPAF.....                             | S6  |
| <b>Figure S2</b> <sup>1</sup> H-NMR and FTIR spectra of SAF, NSPAF and t-SPAF .....                       | S7  |
| <b>Figure S3</b> PL spectra of SAF and NSPAF with different concentrations.....                           | S8  |
| <b>Figure S4</b> UV-Vis spectra of SAF, NSPAF and t-SPAF in water/ethanol mixtures..                      | S8  |
| <b>Figure S5</b> Variation trends for PL intensity of NSPAF and t-SPAF in water/glycerin<br>mixtures..... | S10 |
| <b>Table S1.</b> Element contents and quantum yields of SAF, NSPAF and t-<br>SPAF.....                    | S10 |

## 1. Materials

The phenol materials, including Nonyl phenol and P-tert-butylphenol, were purchased from Energy Chemical Co. Ltd. (Shanghai, China). 37% mass fraction of formaldehyde aqueous solution, acetone and all other reagents were of analytical grade. The water used throughout the experiments was deionized water.

## 2. Experiment sections

### 2.1 Synthesis of sulfonated phenol-acetone-formaldehyde (SPAF) polymers

Polymerization processes for sulfonated phenol-acetone-formaldehyde polymers (NSPAF, t-SPAF) and sulfonated acetone-formaldehyde polymer (SAF) were shown in Figure S1. Using a one-pot method, 5 g of nonyl phenol or *p*-tert-butylphenol was mixed with 25 mL of 10% sodium hydroxide aqueous solution in a round-bottom flask, respectively. After heating at 50°C for 30 min to melt the phenol material, 2.0 mL of formaldehyde aqueous solution (37% mass fraction) was slowly injected and the temperature was maintained at 75°C for 30 minutes. The rest 2.5 mL of formaldehyde aqueous solution and 3.0 mL of acetone were added together, and 5.0 g of sodium sulfite was added 1 hour later, the reaction was stopped after stirring for 4 hours at 90°C. Remained formaldehyde and acetone were removed the by vacuum rotary evaporation, and a certain amount of hydrochloric acid (20% mass fraction) was added to adjust the pH of the value to 2~3. The acidic products were dialyzed by a dialysis membrane (Special products laboratory, USA, MWCO of 1,000 Da) to remove inorganic salts and excessive starting materials and the purified products were then freeze-dried to obtain brown solid powder samples. The two samples, which were obtained using Nonyl phenol or P-tert-butylphenol as raw material, were named as NSPAF and t-SPAF, respectively.

### 2.2 Synthesis of sulfonated acetone-formaldehyde (SAF)

With a similar method, SAF was readily prepared as follows. 6.0 mL of formaldehyde aqueous solution (37% mass fraction) and 3.0 mL acetone were mixed with 25 mL of NaOH aqueous solution (10% mass fraction) in flask, and 5 g of

Na<sub>2</sub>SO<sub>3</sub> was added after heating reflux at 75°C for 1 hour. The temperature was kept at 90°C and the reaction was finished after stirring for 4 hours. The tawny product that we named as SAF was purified through a same method by vacuum rotary evaporation and dialysis membrane after being adjusted to acidic solution.

### 2.3 Characterization and measurements

The molecular weights distributions of samples were determined by Waters 1515 Isocratic HPLP pump/Waters 2487 GPC (Waters Co, Milford, MA, USA) which the calibration standard was polystyrene sulfonate with Mw range from 2 to 100 kDa. The eluent was 0.10 mol/L NaNO<sub>3</sub> solution of 0.50 mL/min, all samples were dissolved and diluted into 0.3 wt% in deionized water and filtered by a 0.22 µm aqueous filter.

The <sup>1</sup>H-NMR and <sup>13</sup>C-NMR spectrum of samples were recorded with 200 mg of each sample dissolved in 0.5 mL of deuterium oxide (D<sub>2</sub>O) at room temperature by DRX-400 spectrometer (Bruker Co., Ettlingen, Germany).

The FTIR spectrum of samples were performed using KBr pellets in the 4000-400 cm<sup>-1</sup> region by Fourier Transform infrared spectrometry of Auto system XL/I-series/Spectrum 2000 spectrometry (Thermo Nicolet Co., Madison, WI, USA).

The contents of elements (C/H/N/S) were rationed with about 5.0 mg packed in aluminized paper by Vario EL cube (Elementar, Germany).

UV-Vis absorption spectra of the samples were obtained by a UV-2450 UV-Vis spectrophotometer (Shimadzu, Germany). The photoluminescence (PL) spectra of samples were obtained on F-4500 fluorescence spectrometer (Hitachi, Japan) with photomultiplier tube voltage of 400 V and scanning speed of 1200 nm/min, and all samples were recorded using excitation wavelength of 320 nm.

Particle sizes distributions were monitored with the concentration of 0.5 g/L using Dynamic light scattering (DLS) on a Zeta PALS instrument (Brookhaven, USA). The Atomic force microscopy (AFM) image was recorded by Park XE-100 instrument in tapping mode to observe the nanoparticle of SAF. The sample was spread out on the mica plate with the concentration of 0.5 g/L.

The quantum yield of each sample was calculated using a formula shown below.

$$\Phi_x = \Phi_{ST} \left( \frac{I_x / A_x}{I_{ST} / A_{ST}} \right) \left( \frac{\eta_x^2}{\eta_{ST}^2} \right)$$

Using quinine sulfate as the fluorescence standard and controlling the UV absorbance of samples less than 0.06 in the excitation wavelength of photoluminescence.  $I$  is the integral area of PL spectra.  $\eta$  is the refractive index (RI) of the solvent. The QY of quinine sulfate ( $\Phi_{ST}$ ) is 0.54 dissolved in 0.1M H<sub>2</sub>SO<sub>4</sub>. AF was dissolved in ethanol which RI is 1.362. SAF and SEAF both dissolved in water which RI is 1.333.

### 3. Synthesis route and chemical structure

**Scheme S1** Synthesis route and chemical structure of SAF and SPAFs; s, m and n in the structures respectively indicate the polymerization degree of different elements; R indicates different substituent groups of the phenols.

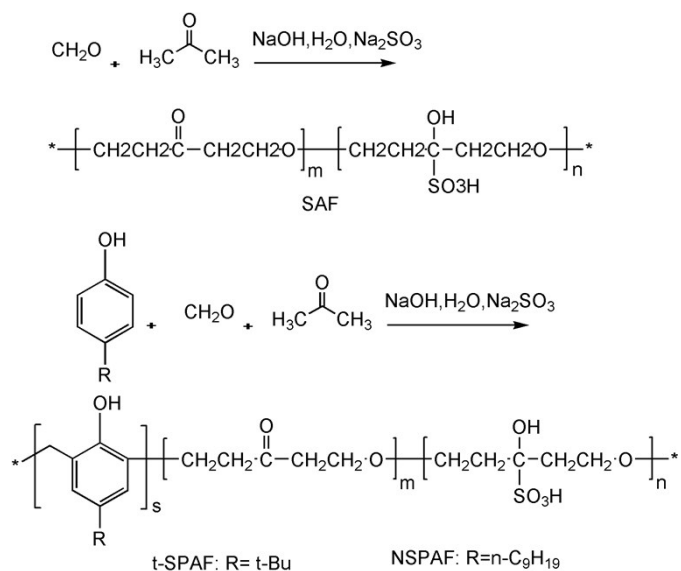

### 4. Partial characterization results

**Figure S1** Molecular weights distributions of SAF, NSPAF and t-SPAF.

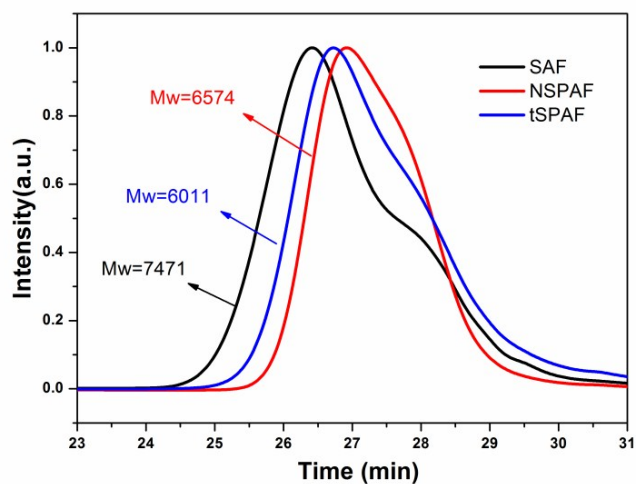

Figure S2 <sup>1</sup>H-NMR and FTIR spectra of SAF, NSPAF and t-SPAF.

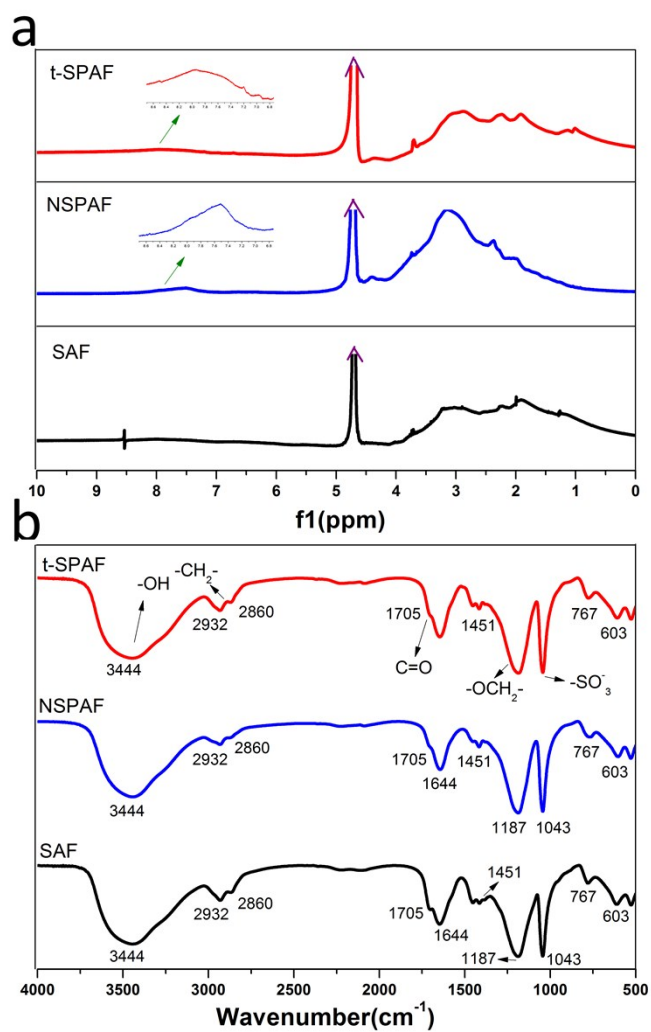

**Figure S3** a1), b1) PL spectra of the samples with different concentrations; a2), b2) Plot of PL intensity and fluorescence wavelength versus different concentrations of samples; (a) SAF, (b) NSPAF

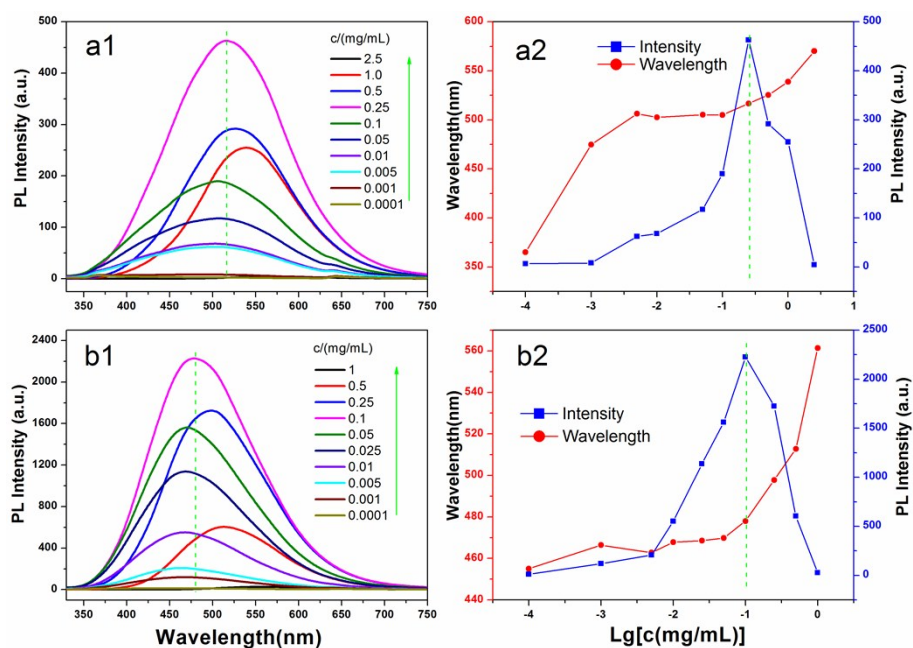

**Figure S4** UV-Vis spectra of SAF and SPAFs in water/ethanol mixtures with different ethanol fractions ( $f_w$ ), (a) SAF, (b) NSPAF, (c) t-SPAF,  $[c] = 1.0 \times 10^{-3}$  g/L.

(a) SAF

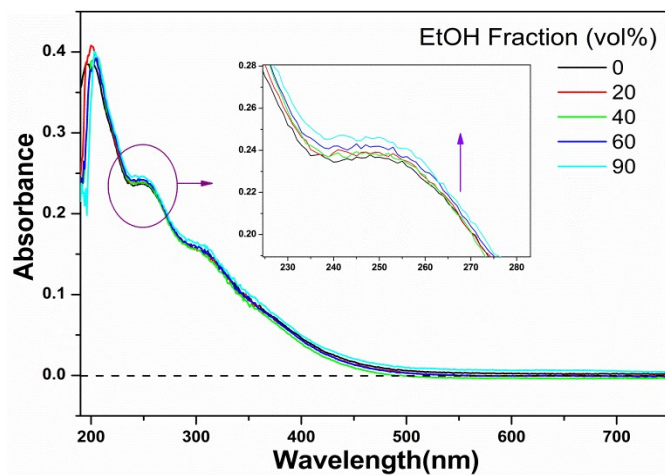



(b) NSPAF

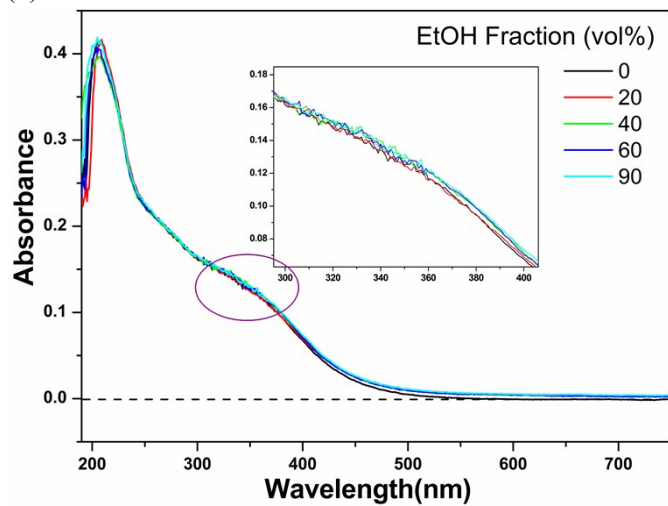

(c) t-SPAF

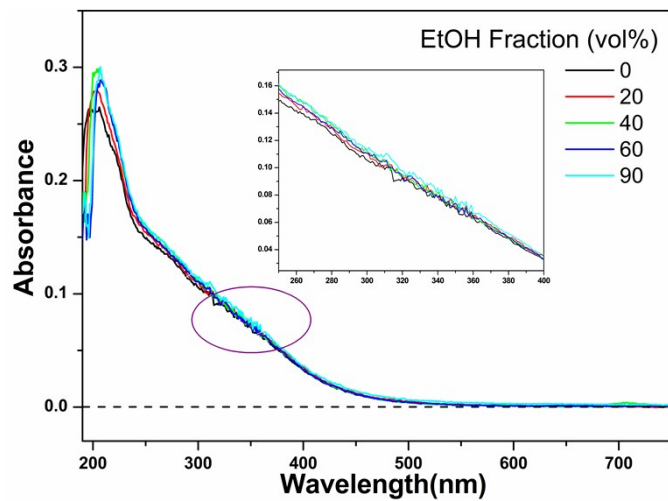

**Figure S5** The variation trends for PL intensity of SPAFs in water/glycerol mixtures with glycerin fractions from 0 to 90%.  $\lambda_{\text{ex}} = 320\text{nm}$ ,  $[c] = 1.0 \times 10^{-3}\text{g/L}$ .

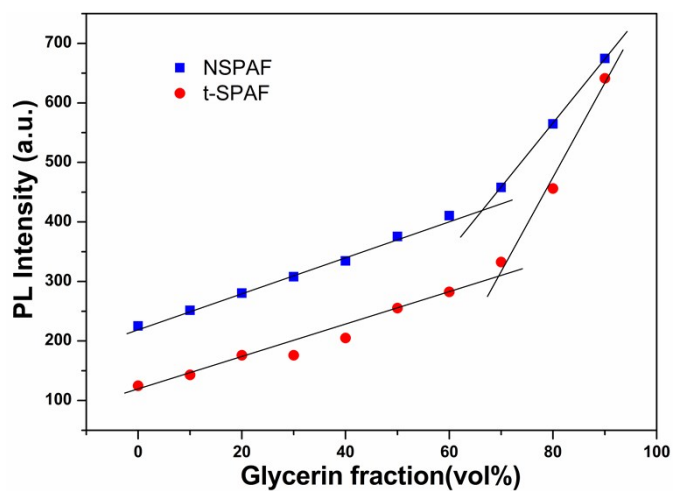

**Table S1** Element contents (C, H, N, S) and quantum yields of SAF, NSPAF and t-SPAF

| Samples | Element contents (%) |       |       |       | Quantum yields (%) |
|---------|----------------------|-------|-------|-------|--------------------|
|         | C                    | H     | N     | S     |                    |
| SAF     | 32.98                | 4.561 | 0.096 | 9.911 | 1.8                |
| NSPAF   | 28.77                | 4.179 | 0.140 | 12.55 | 8.3                |
| t-SPAF  | 32.67                | 4.434 | 0.114 | 15.31 | 4.3                |
